# Supplementary material for: Roles for transcript leaders in translation and mRNA decay revealed by transcript leader sequencing
Source: HighWire-hosted journal article supplement (doi:10.1101/gr.150342.112), 2013-04-11
Supplement: Supplemental_Material.docx [file Supplemental_Material.docx]

**Supplementary Information**

**Supplemental Figures**

**Table S1. Strains Used For In Vivo Translation**

| *E. coli* strain | Plasmid |
| --- | --- |
|  | pRS415GAL1 pGAL1-CYC1 *LEU* |
| BWG554 | pRS415GAL1 pGAL1-FLUC-CYC1 *LEU* |
| BWG557 | pWG554 pGAL-tl*CMP2*[-63,-3]-FLUC-CYC1 |
| BWG558 | pWG554 pGAL-tl*CMP2*[-125,-3]-FLUC-CYC1 |
| BWG559 | pWG554 pGAL-tl*KAP95*[-138,-3]-FLUC-CYC1 |
| BWG560 | pWG554 pGAL-tl*KAP95*[-202,-3]-FLUC-CYC1 |
| BWG561 | pWG554 pGAL-tl*PIR1*[-104,-3]-FLUC-CYC1 |
| BWG562 | pWG554 pGAL-tl*PIR1*[-383,-3]-FLUC-CYC1 |
| BWG563 | pWG554 pGAL-tl*CRZ1*[-120,-3]-FLUC-CYC1 |
| BWG564 | pWG554 pGAL-tl*CRZ1*[-330,-3]-FLUC-CYC1 |
| BWG565 | pWG554 pGAL-tl*YDR089W*[-46,-3]-FLUC-CYC1 |
| BWG566 | pWG554 pGAL-tl*YDR089W*[-191,-3]-FLUC-CYC1 |
| BWG567 | pWG554 pGAL-tl*YDL129W*[-37,-3]-FLUC-CYC1 |
| BWG568 | pWG554 pGAL-tl*YDL129W*[-163,-3]-FLUC-CYC1 |
| BWG569 | pWG554 pGAL-tl*AGP1*[-46,-3]-FLUC-CYC1 |
| BWG570 | pWG554 pGAL-tl*AGP1*[-98,-3]-FLUC-CYC1 |
| BWG571 | pWG554 pGAL-tl*AGP1*[-281,-3]-FLUC-CYC1 |

| Yeast Strain | Relevant Genotype |
| --- | --- |
| YWG11 | BY4742 Mat *α his3∆1 leu2∆0 lys2∆0 ura3∆0* |
| YWG733 | YWG11 transformed with pWG557 |
| YWG734 | YWG11 transformed with pWG558 |
| YWG735 | YWG11 transformed with pWG559 |
| YWG736 | YWG11 transformed with pWG560 |
| YWG737 | YWG11 transformed with pWG561 |
| YWG738 | YWG11 transformed with pWG562 |
| YWG739 | YWG11 transformed with pWG563 |
| YWG740 | YWG11 transformed with pWG564 |
| YWG741 | YWG11 transformed with pWG565 |
| YWG742 | YWG11 transformed with pWG566 |
| YWG743 | YWG11 transformed with pWG567 |
| YWG744 | YWG11 transformed with pWG568 |
| YWG745 | YWG11 transformed with pWG569 |
| YWG746 | YWG11 transformed with pWG570 |
| YWG747 | YWG11 transformed with pWG571 |

**Table S2. Oligonucleotides Used For In This Study**

| Name | Purpose | Oligonucleotide Sequence |
| --- | --- | --- |
| *YKR078W* | Northern | AAGTAGGTGCACTTGAACCAAAGG |
| *EPL1* | Northern | CAGTCTGGTGATATAGTCCCTACG |
| *PDR10* | Northern | AGTTCCTGGTGCAGCACCTACTAT |
| TLSeqAdaptor1 | TL-seq, TATL-seq | AAUGAUACGGCGACCACCGACAGGUUCAGAGUUCUACAGUCCGACG |
| TLSeqAdaptor2 | TL-seq Replicates | AAUGAUACGGCGACCACCGACAGGUUCAGAGUUCUACAGUCCGACGAUC |

**Table S3. Genes With Similar Internal TSSs Between TL-seq and (Miura et al. 2006)**

| Gene | Empirical P-value | Miura TSS | TL-seq TSS | Distance (nt) |
| --- | --- | --- | --- | --- |
| *YNR008W* | 0.0057 | 1672 | 1678 | 6 |
| *YML021C* | 0.0087 | 21 | 26 | 5 |
| *YNL284C* | 0.0183 | 42 | 51 | 9 |
| *YPL108W* | 0.0490 | 27 | 14 | 13 |
| *YGL212W* | 0.0386 | 27 | 8 | 19 |
| *YGR079W* | 0.0209 | 105 | 117 | 12 |
| *YML126C* | 0.0022 | 65 | 67 | 2 |
| *YML050W* | 0.0473 | 35 | 12 | 23 |
| *YLR092W* | 0.0235 | 1549 | 1581 | 32 |
| *YKL219W* | 0.0199 | 59 | 72 | 13 |
| *YIL120W* | 0.0270 | 859 | 836 | 23 |
| *YIL064W* | 0.0015 | 52 | 51 | 1 |
| *YAL059W* | 0.0015 | 59 | 58 | 1 |
| *YGR233C* | 0.0192 | 3448 | 3414 | 34 |
| *YNL216W* | 0.0182 | 12 | 35 | 23 |
| *YHL006C* | 0.0416 | 361 | 371 | 10 |
| *YNL240C* | 0.0007 | 1344 | 1343 | 1 |
| *YAR031W* | 0.0224 | 151 | 162 | 11 |
| *YJL060W* | 0.0023 | 8 | 10 | 2 |
| *YKL022C* | 0.0126 | 102 | 86 | 16 |
| *YJR074W* | 0.0259 | 91 | 82 | 9 |

To assess whether a gene contained closely spaced TSSs between the two studies, all genes with a single internal TSS in both studies were identified. The distance between those two TSSs was compared to 100,000 randomly chosen pairs of points in the ORF. P-value indicates the fraction of randomly chosen pairs whose distance was less than the observed distance from the two studies.

**Figure S1. TL-seq produces TSS annotations, Related to Figure 1**

(A) TL-seq peaks show nucleosome distributions expected for TSSs. Average nucleosome distribution about TL-seq peaks upstream of ORFs, where each nucleosome was modeled as a Gaussian according to parameters and positions given in (Mavrich et al. 2008).

(B) TL-seq TL lengths and abundances are correlated between biological replicates. TL-seq was performed on poly(A)-selected RNA from two independent liquid cultures grown in parallel. Results show TL lengths annotated by TL-seq (left), and those TL peaks’ abundances (right).

(C) TL-seq TL lengths are correlated with other annotations. Spearman’s ρ is indicated on each graph for TL lengths annotated by TL-seq or tiling microarray (Xu et al. 2009; David et al. 2006). The left graph shows the line y=x, demonstrating that TL-seq tends to call shorter TLs whereas (Xu et al. 2009) tend to call longer TLs. Notably, the correlation between TL lengths determined by different methods was only slightly less than the reproducibility of TL lengths from two studies using the same tiling microarray approach.

**Figure S2. TL-seq Detects Internal Peaks with a TSS-like Nucleosome Distribution, Related to Figure 2**

(A) The cumulative number of peaks in each class (5’TL/ORF/3’UTR) versus p-value rank from peak-calling algorithm is shown. Even at stringent p-value cutoffs (left side of graph), a significant number of internal peaks persist.

(B) Internal peaks exhibit a nucleosome signature characteristic of TSSs. The average nucleosome signature of groups of peaks (upstream of genes or ORF-internal) is shown.

(C) Nucleosome score plotted against fraction of internal peaks, binned by nucleosome score using a bin size of 100 peaks. For each TL-seq peak, a nucleosome score was defined according to that peak’s nucleosome distribution’s concordance with the genome-wide average (Spearman’s ρ). Under the assumption that TL-seq peaks with a higher nucleosome signature score are more likely to represent true TSSs, we examined the distribution of peaks at different scores. The “true” fraction of internal peaks is the limit at the data approach a nucleosome signature score of 1, where the fraction of true positives approaches one. At high nucleosome scores (e.g. ≥0.5), we observed that the fraction of internal peaks levels off at ~6%. A sigmoid function was fit to the data and the limit inferred. Table shows the same calculation performed at different bin sizes, demonstrating that the limit is not a function of the arbitrary bin size.

(D) Nucleosome score plotted against fraction of all internal peaks that are N-terminal (within 100 nts of the 5’ boundary of an ORF). Analysis similar to part (C), but with the ordinate as fraction of all internal peaks being N-terminal. Table shows results for different bin sizes. Due to the paucity of data at high nucleosome signature scores, the function yielded a poor fit and anomalously high percentages (bin sizes 50 and above). Thus the fraction of true internal peaks that are ≤100 nt into the ORF is 85-100%.

**Figure S3. Northern Validation of Internal Peak-containing Genes, Related to Figure 2**

The expected differences in transcript sizes (in kb) from TL-seq are: 1.0 (*YKR078W)*; 1.4 (*EPL1*); and 1.9 (*PDR10*). The lower *PDR10* species was not predicted by TL-seq. Sizes of markers (in kb) are indicated to the right of each gel. Predicted bands indicated with asterisks.

**Figure S4. TL-seq Internal Peaks Are Also Peak-like in RNA-seq Libraries Made Using Similar 5’-capture Techniques, Related to Figure 2**

The distribution of RNA-seq reads about internal TL-seq peak positions was analyzed for RNA-seq libraries prepared by different protocols. While TL peaks upstream of an ORF exhibit the distribution expected of TSSs (inset), the ORF-internal peaks do not. Furthermore, the peak-like distribution in the RNA-seq read distribution about ORF-internal TL-seq peaks is much greater when T4 RNA Ligase was used for library preparation. Reads were averaged in a 20 nt sliding window.

**Figure S5. Validation of Steady State mRNA Fold Changes in NMD-Deficient Yeast, Related to Figure 3**

(A) qPCR validation of microarray results. 4/5 genes predicted to increase based on microarray results in *upf1Δ* do so (purple), whereas 4/4 genes predicted not to increase do not (orange). *PDA1* and *TEF1* are negative controls. Bars are mean and standard deviation. *p<0.05.

(B) Same for *upf2Δ*.

(C) Same for *upf3Δ*.

**Figure S6. There Are No Detectable Effects of Near-uAUG Codons on Translation or NMD, Related to Figure 5**

(A) TATL-seq sedimentation pattern for all uNNN-containing TLs on the same plot.

(B) TE from Ribo-seq was compared for uNNN-containing and all TLs. Significant assessed with KS test. While three near-uAUG codons (GUG, AGG, and UUG) were associated with a slight decrease in TE in rich media, these changes were not significant after correction for multiple hypothesis testing (p<0.0007). Near-uAUG codons highlighted in white.

(C) KS test p-value for differences in fold change of mRNA steady state levels in *upf1Δ*. Only uAUG is significant. Similar results were obtained for *upf2Δ* and *upf3Δ*.

**Figure S7. Distribution of TL Peaks Across a Polysome Gradient for Genes Shown in Figure 7D, Related to Figure 7**

To determine the predicted relative translation between constructs, we compared their relative sedimentation with polysomes, that is, the ratio of RPKMs in the translating pool (fractions 3-7) to the non-translating pool (fraction 1).

**Supplemental Methods**

**RNA Isolation and Polysome Gradient Fractionation**

Total RNA was isolated from yeast cell pellets by hot phenol extraction as described (Clarkson et al. 2010). Polysome gradients were prepared and RNA was extracted from gradient fractions as described (Arribere et al. 2011). For Northern blots, RNA was separated on 1.1% agarose, 6% formaldehyde gels and blotted as previously described (Carlile and Amon 2008). Primer sequences for probes are given in Table S2. qPCR was performed as previously described (Arribere et al. 2011). Fold change over RNA levels in mutant strains was determined by first normalizing RNA levels to 18S rRNA, then dividing by this same quantity from wild type yeast.

**Read Assignment**

The yeast genome and annotations were downloaded from the Saccharomyces Genome Database (yeastgenome.org) on May 26, 2010. 35 nt reads were mapped to the genome using Bowtie (Langmead et al. 2009) allowing for three mismatches. For multiply mapping reads, read counts were divided by the total number of places where they mapped. The majority of reads mapped intergenically; for annotation purposes reads were assigned to the nearest protein-coding gene. The intergenic distance between ORF boundaries irrespective of strand was bisected, and reads mapping up- or downstream of this boundary were assigned to the up- or downstream gene, respectively. Reads in the sense orientation mapping within a feature’s boundaries were assigned to that gene, and antisense-oriented reads (~9% of TL-Seq library) were ignored for the analyses shown here.

**Peak RPKM**

To determine peak abundances (Fig S1 and 4), RPKM was calculated. The numerator (“RPK”) was the number of reads per kilobase of peak (50 nt or 0.05 for most peaks) and the denominator (“M”) was the total number of mRNA-mapping reads. Analyses were also performed with “M” as peak-mapping reads and gave similar results.

**Ribosome Footprint Profiling**

To identify AUG initiation codon peaks, Ribo-seq was performed on Sigma 1278b yeast starved for glucose for 3 hours and incubated with cycloheximide in vivo. Ribo-seq and analysis was performed as previously described (Ingolia et al. 2009). For metagene plots, 5’ ends of reads were offset by 12 nts to indicate the position corresponding to the ribosomal P-site. Gene-specific translation efficiency was defined as log2 of the ratio of footprint read density (footprint reads per kilobase per million (RPKM)) to RNA-seq read density (total RPKM) for all genes with at least 64 reads in each library, excluding the first 8 codons of the ORF. Excluding the first 8 codons yields the most reproducible Ribo-seq density; the results shown here are the same if the first 8 codons are included in the calculation. For all analyses of published Ribo-seq data, translation efficiency was recalculated according to this formula.

**Nucleosome Analysis**

Each nucleosome was modeled with a Gaussian probability density function using the positions and parameters (nucleosome intensity, standard deviation) given from nucleosome ChIP-seq (Mavrich et al. 2008). An average nucleosome distribution was calculated from all TL-seq peaks upstream of ORFs. For each TL-seq peak, a nucleosome signature score was defined by comparing that peak’s nucleosome distribution to the average distribution for all genes and quantitated with Spearman’s ρ.

**Comparison with other TSS annotations**

Transcript boundaries from computational analysis of tiling microarray arrays were compared to their respective genome annotations to determine TL lengths (David et al. 2006; Xu et al. 2009). TL lengths were compared among these datasets and correlation was determined.

**Peak Filters**

To avoid spurious conclusions from artifactual peaks, peaks were subject to an *in silico* subtractive peak approach or filtered by nucleosome signature. For the *in silico* subtractive peak approach, the peak-calling algorithm was applied to an RNA-seq library prepared with T4 RNA ligase (Geisler et al. 2012). Any TL-seq peak that overlapped with an RNA-seq peak was removed from further analyses. For the nucleosome signature approach, each TL-seq peak’s surrounding nucleosome density (from (Mavrich et al. 2008)) was compared to the average nucleosome distribution of all TL-seq peaks upstream of an ORF (shown in Figure S1A). Spearman’s ρ was used to assess the degree to which a peak’s nucleosome density agreed with the genomic average. All of these approaches preferentially removed ORF-internal TL-seq peaks. Analyses shown were repeated with *in silico* subtracted TL-seq peaks or all peaks passing a nucleosome signature score ρ≥0.1, 0.3, or 0.5; all results were qualitatively the same. All analyses shown were of unfiltered TL-seq peaks.

**Luciferase Reporter Assays**

To assess the translation activity of an individual TL, we created an inducible system for assaying translation in vivo. pRS415 with the *GAL1* promoter and *CYC1* terminator was obtained from (Mumberg et al. 1994). A NotI site was introduced upstream of the *CYC1* terminator and a BglII site was inserted at the TSS of the *GAL1* promoter by site-directed mutagenesis. Firefly luciferase was inserted as a HindIII-NotI fragment, thus generating the vector pWG554. Each TL was PCR amplified from genomic DNA and cloned as a BamHI-NcoI fragment into pWG554. All constructs were confirmed by restriction analysis and sequencing. Plasmids were introduced into BY4742 by LiAc transformation to make the strains listed in Table S1.

Strains were grown overnight in SC –Leu, 2% Raffinose, 2% Galactose. At OD600=0.5-1.0, cells were harvested by centrifugation and flash frozen. Lysates were prepared by vortexing with glass beads in cold lysis buffer (1x PBS, 1mM PMSF, +protease inhibitors), and clarified by centrifugation for 30” at 16,000 RCF, followed by 5’ at 16,000 RCF at 4°C. The supernatant was removed to a new tube and luciferase activity was assayed with Bright-Glo (Promega) in a Centro XS Luminescence Microplate Reader (Berthold Technologies). Luciferase was normalized to lysate concentration based on absorbance at 260nm. RNA was extracted from lysate by phenol-chloroform and *Fluc* mRNA levels normalized to 18S rRNA levels were determined by RT-qPCR .

**Normalized Read Density**

At a given position in a gene, the normalized read density was defined as the read count at that position divided by the read density across the whole gene. Read density was defined as the total number of reads mapping to that gene divided by the length of that gene. For a group of genes, the normalized read density is simply the average of all individual genes in that group.

**Supplementary Text**

Note on cryptic initiation:

Approximately one percent of TSSs were ≥100 nt internal to the ORF. Similar internal initiation events, termed “cryptic initiation”, have previously been observed in yeast mutants with defects in chromatin structure and/or transcription elongation as well as in wild type cells subject to starvation (Kaplan 2003; Cheung et al. 2008). For certain genes including *FLO8* and *STE11*, increased H3K4 trimethylation, increased H4 acetylation, and decreased H3K36 methylation correlate with an increase in cryptic initiation events (Carrozza et al. 2005). Comparing these chromatin modifications averaged across internal peak-containing genes versus all genes, we did not observe a significant difference in H4 acetylation nor H3K36 methylation, and in fact observed a slight decrease in H3K4 trimethylation (p=0.011, Mann Whitney U test) (using data from (Pokholok et al. 2005)). It is thus unclear whether the internal TSS events observed here are mechanistically related to previously described instances of cryptic initiation. Genome-wide microarray studies of cryptic transcription in yeast proposed that at least 17% of genes have the potential for cryptic initiation under some circumstances (Cheung et al. 2008).

**Supplemental References**

Arribere JA, Doudna JA, Gilbert WV. 2011. Reconsidering Movement of Eukaryotic mRNAs between Polysomes and P Bodies. *Molecular Cell* **44**: 745–758.

Carlile TM, Amon A. 2008. Meiosis I Is Established through Division-Specific Translational Control of a Cyclin. *Cell* **133**: 280–291.

Carrozza MJ, Li B, Florens L, Suganuma T, Swanson SK, Lee KK, Shia W-J, Anderson S, Yates J, Washburn MP, et al. 2005. Histone H3 Methylation by Set2 Directs Deacetylation of Coding Regions by Rpd3S to Suppress Spurious Intragenic Transcription. *Cell* **123**: 581–592.

Cheung V, Chua G, Batada NN, Landry CR, Michnick SW, Hughes TR, Winston F. 2008. Chromatin- and transcription-related factors repress transcription from within coding regions throughout the Saccharomyces cerevisiae genome. *Plos Biol* **6**: e277.

Clarkson BK, Gilbert WV, Doudna JA. 2010. Functional overlap between eIF4G isoforms in Saccharomyces cerevisiae. *PLoS ONE* **5**: e9114.

David L, Huber W, Granovskaia M, Toedling J, Palm CJ, Bofkin L, Jones T, Davis RW, Steinmetz LM. 2006. A high-resolution map of transcription in the yeast genome. *Proc Natl Acad Sci USA* **103**: 5320–5325.

Geisler S, Lojek L, Khalil AM, Baker KE, Coller J. 2012. Decapping of Long Noncoding RNAs Regulates Inducible Genes. *Molecular Cell* **45**: 279–291.

Ingolia NT, Ghaemmaghami S, Newman JRS, Weissman JS. 2009. Genome-Wide Analysis in Vivo of Translation with Nucleotide Resolution Using Ribosome Profiling. *Science* **324**: 218–223.

Kaplan CD. 2003. Transcription Elongation Factors Repress Transcription Initiation from Cryptic Sites. *Science* **301**: 1096–1099.

Langmead B, Trapnell C, Pop M, Salzberg SL. 2009. Ultrafast and memory-efficient alignment of short DNA sequences to the human genome. *Genome Biol* **10**: R25.

Mavrich TN, Ioshikhes IP, Venters BJ, Jiang C, Tomsho LP, Qi J, Schuster SC, Albert I, Pugh BF. 2008. A barrier nucleosome model for statistical positioning of nucleosomes throughout the yeast genome. *Genome Research* **18**: 1073–1083.

Mumberg D, Müller R, Funk M. 1994. Regulatable promoters of Saccharomyces cerevisiae: comparison of transcriptional activity and their use for heterologous expression. *Nucleic Acids Res* **22**: 5767–5768.

Pokholok DK, Harbison CT, Levine S, Cole M, Hannett NM, Lee TI, Bell GW, Walker K, Rolfe PA, Herbolsheimer E, et al. 2005. Genome-wide Map of Nucleosome Acetylation and Methylation in Yeast. *Cell* **122**: 517–527.

Xu Z, Wei W, Gagneur J, Perocchi F, Clauder-Münster S, Camblong J, Guffanti E, Stutz F, Huber W, Steinmetz LM. 2009. Bidirectional promoters generate pervasive transcription in yeast. *Nature* **457**: 1033–1037.
